# Supplementary material
Source: PubMed Central journal article supplement (PMC7509868)
Supplement: advancesADV2020002475-suppl1.pdf [file advancesADV2020002475-suppl1.pdf]

**Supplemental materials for Peslak et al. HRI depletion cooperates with pharmacologic inducers to strongly elevate fetal hemoglobin and reduce sickle cell formation**

**SUPPLEMENTAL FIGURE 1**

**A**

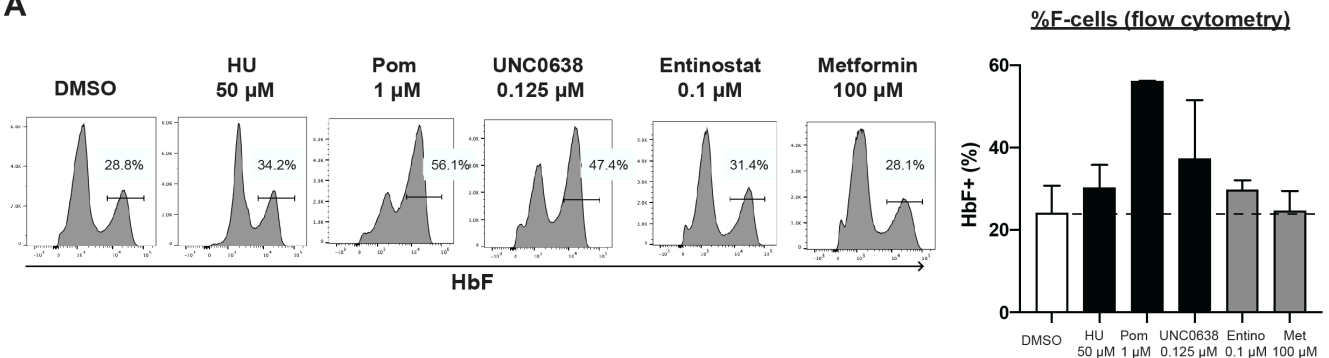

**B**

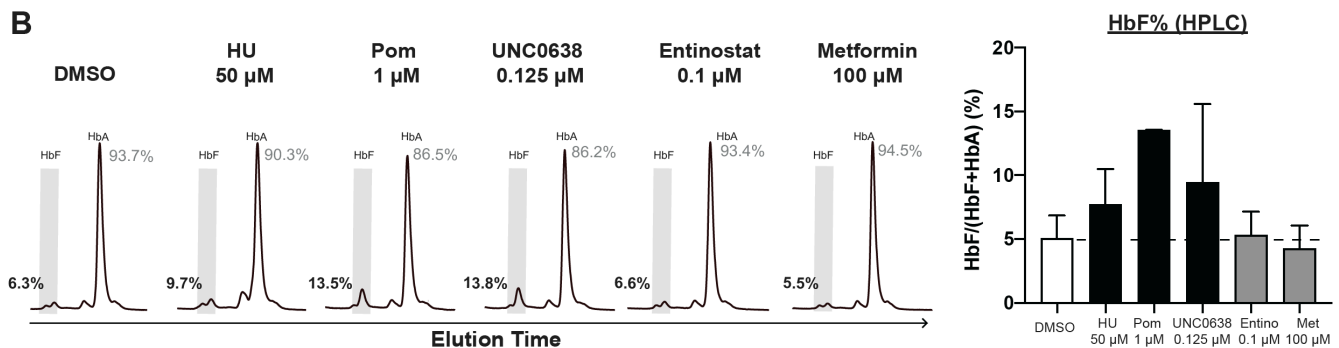

**Supplemental Figure 1. Select pharmacologic HbF inducers raise HbF levels in vitro. A.** F-cell quantitation by flow cytometry in CD34<sup>+</sup> healthy donors following treatment with DMSO control, hydroxyurea (HU), pomalidomide (Pom), UNC0638, entinostat, or metformin. % F-cells are quantified for each sample. **B.** HbF levels (quantified as percent of total HbF+HbA peaks) by HPLC. DMSO serves as pharmacologic vehicle control. Error bars represent standard deviation. N=2 independent biological replicates.

## SUPPLEMENTAL FIGURE 2

A

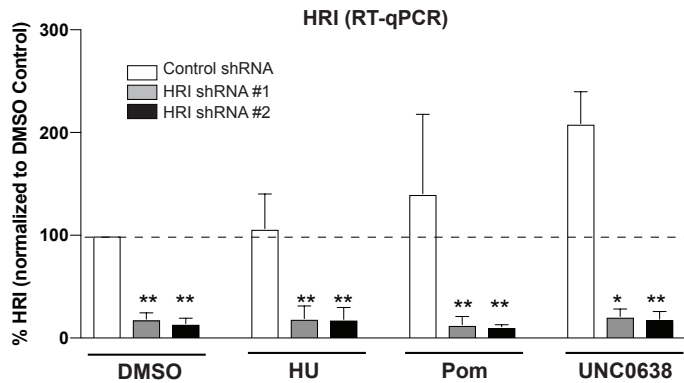

B

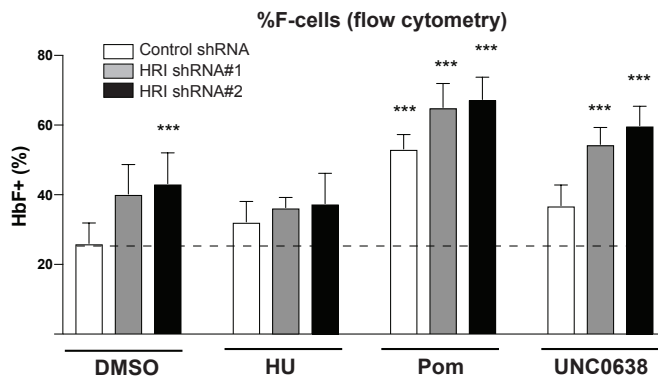

C

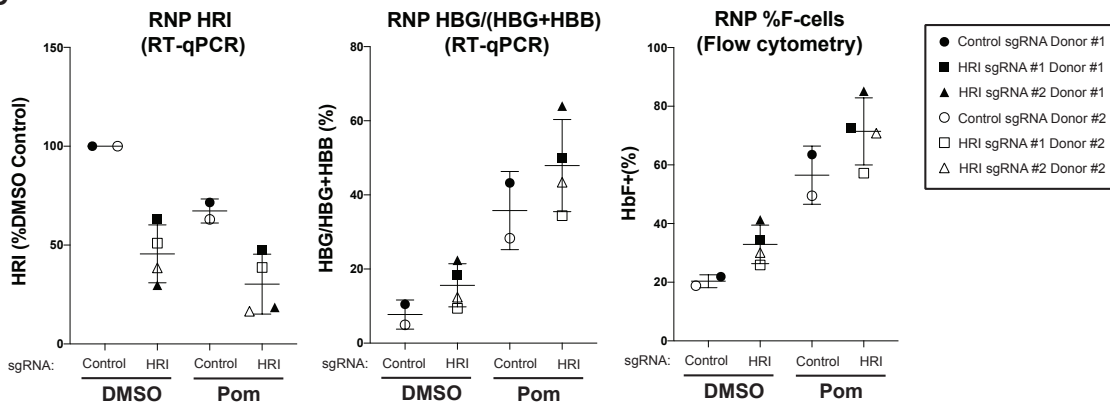

**Supplemental Figure 2. HRI knockdown cooperates with pomalidomide or UNC0638 during HbF induction.** **A.** HRI transcript levels (normalized to DMSO control) of healthy CD34<sup>+</sup> donors as measured by RT-qPCR following shRNA scrambled control or HRI depletion with two independent shRNA combined with either vehicle control or HbF pharmacologic induction (50  $\mu$ M hydroxyurea (HU), 1  $\mu$ M pomalidomide (Pom), or 0.125  $\mu$ M UNC0638). **B.** F-cell quantitation by flow cytometry following shRNA scrambled control or HRI shRNA depletion combined with HbF pharmacologic induction. N=3 independent biological replicates for shRNA-based experiments. Statistical analyses done using two-way ANOVA analysis. \* represents significance as compared to DMSO control. \*  $p < 0.05$ ; \*\*  $p < 0.01$ ; \*\*\*  $p < 0.001$ . **C.** Quantitation of HRI transcript (left panel, normalized to DMSO control);  $\gamma$ -globin transcript levels (center panel, expressed as  $\gamma$ -globin/ $\gamma$ -globin +  $\beta$ -globin); and % F-cells (right panel, obtained by flow cytometry) following RNP-based depletion of HRI combined with vehicle control or 1  $\mu$ M pomalidomide treatment. N=2 independent biological replicates for RNP-based experiments. DMSO serves as pharmacologic vehicle control for all samples. Error bars represent standard deviation.

## SUPPLEMENTAL FIGURE 3

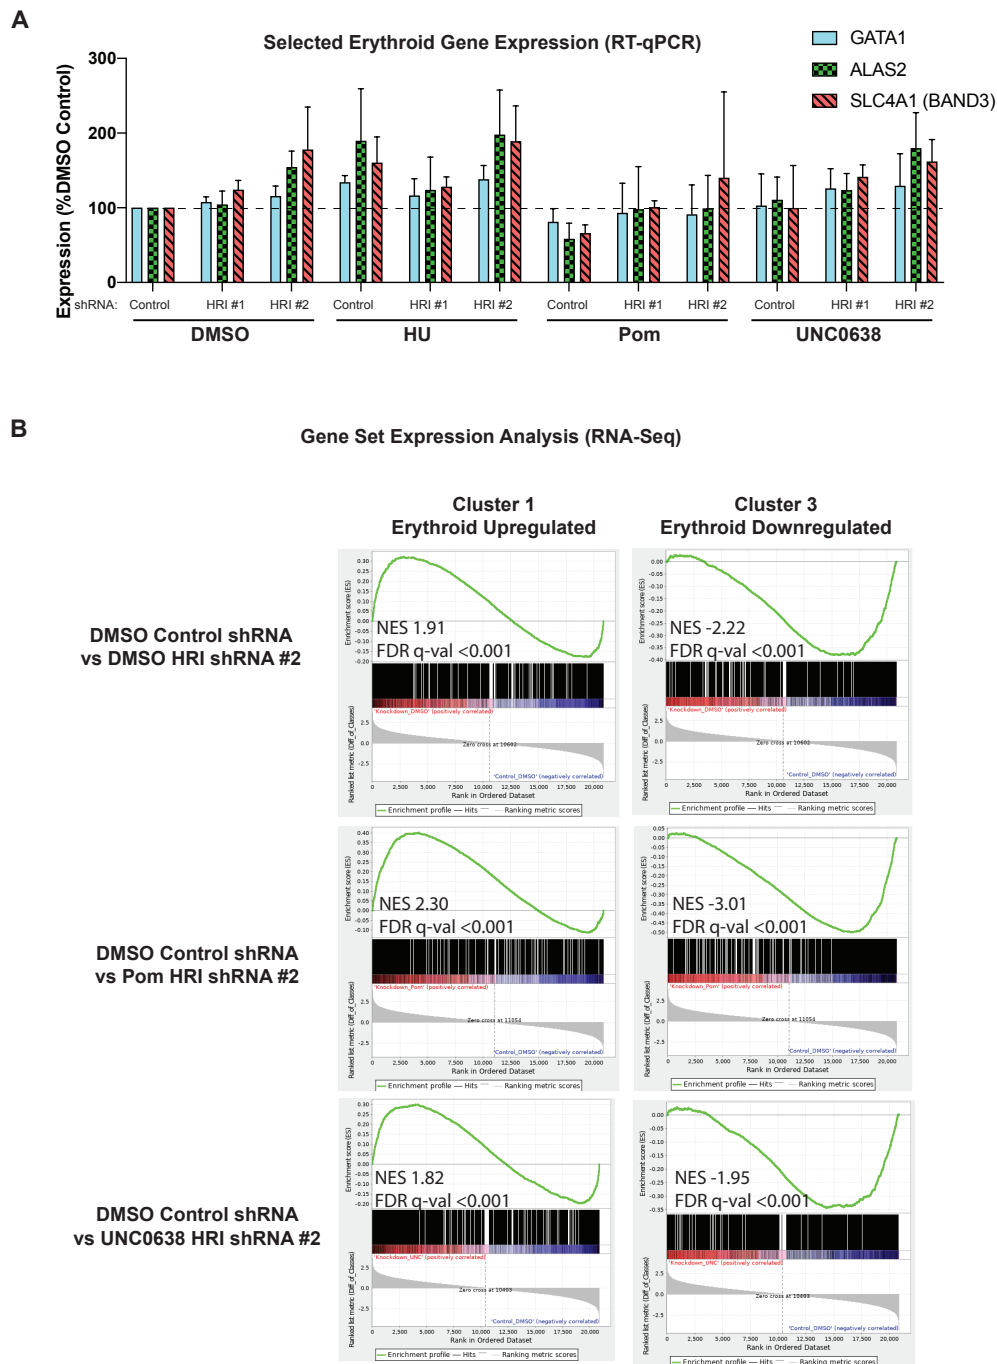

**Supplemental Figure 3. Gene set enrichment analysis of HRI-depleted  $CD34^+$  derived cells treated with either pomalidomide or UNC0638 using erythroid differentiation transcriptional signatures.** **A.** Expression levels of select erythroid differentiation genes (normalized to DMSO control) as measured by RT-qPCR. N=3 independent biological replicates. Error bars represent standard deviation. **B.** Gene set enrichment analysis of RNA-Seq data from HRI-depleted  $CD34^+$  derived cells treated with either DMSO control, 1  $\mu$ M pomalidomide, or 0.125  $\mu$ M UNC0638 using erythroid differentiation transcriptional signatures. Cluster 1 contains genes that are upregulated during erythroid differentiation and cluster 3 contains genes that are downregulated during erythroid differentiation. NES, normalized enrichment score; FDR, false discovery rate.

## SUPPLEMENTAL FIGURE 4

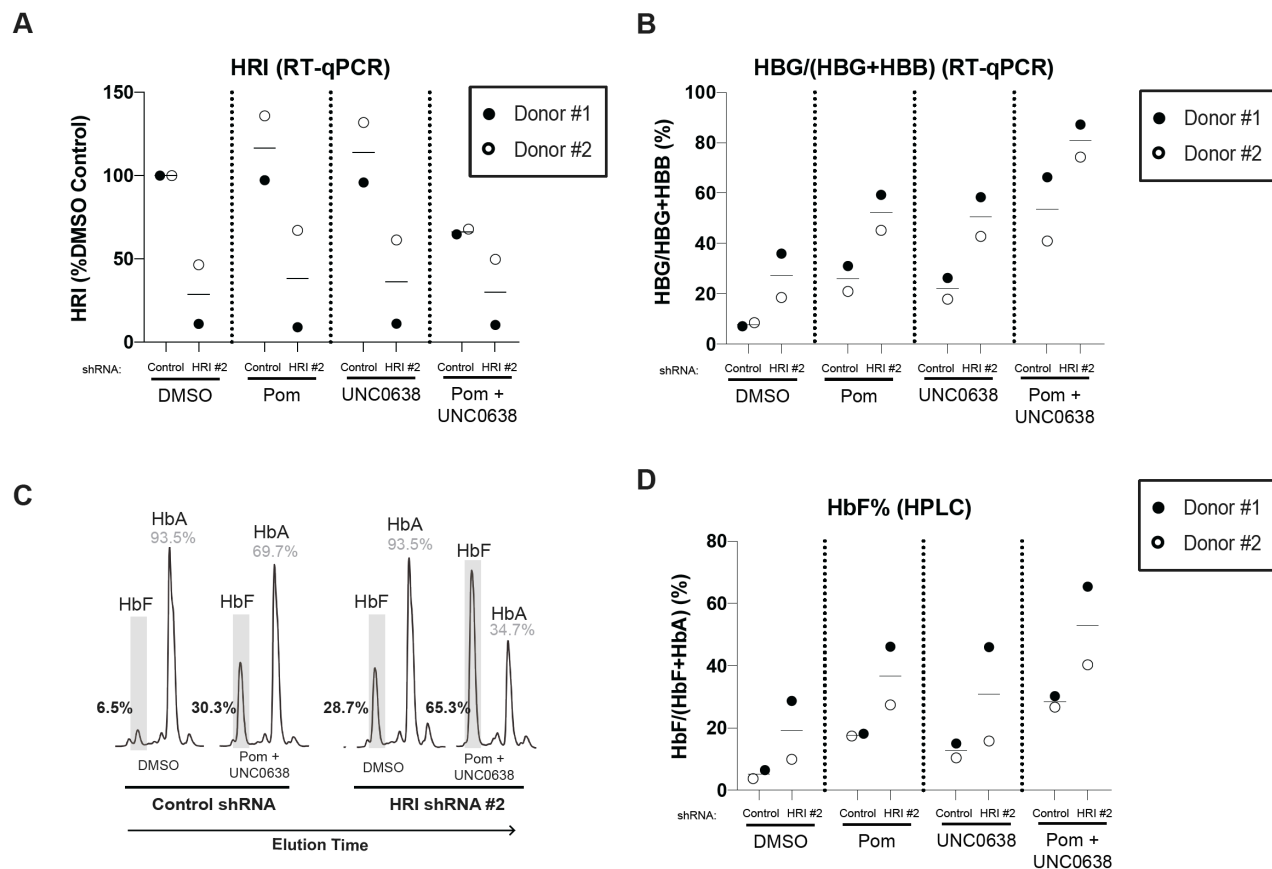

**Supplemental Figure 4. HRI depletion combined with both pomalidomide and UNC0638 treatment leads to very high levels of HbF induction.** **A.** HRI transcript levels following shRNA-mediated depletion of HRI combined with either vehicle control, 1  $\mu$ M pomalidomide, 0.125  $\mu$ M UNC0638, or 1  $\mu$ M pomalidomide+0.125  $\mu$ M UNC0638 treatment. **B.**  $\gamma$ -globin transcript levels (right panel, expressed as  $\gamma$ -globin/ $\gamma$ -globin +  $\beta$ -globin). **C.** Representative HPLC tracings of HbF and HbA. **D.** HbF levels (quantified as percent of total HbF+HbA peaks) by HPLC. N=2 independent biological replicates. DMSO serves as pharmacologic vehicle control. Error bars represent standard deviation.

## SUPPLEMENTAL FIGURE 5

**A**

### HRI (RT-qPCR)

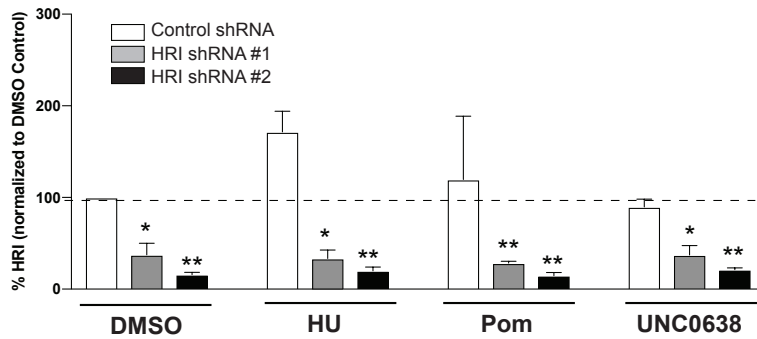

**B**

### %F-cells (flow cytometry)

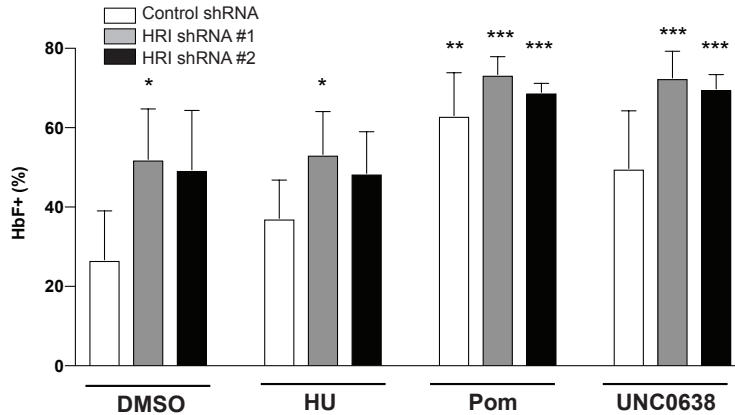

**Supplemental Figure 5. HRI knockdown cooperates with pharmacologic inducers during HbF induction in SCD patient-derived cells. A.** HRI transcript levels (normalized to DMSO control) as measured by RT-qPCR in SCD patient-derived cells following shRNA scrambled control or HRI depletion with two independent shRNA combined with HbF pharmacologic induction (50  $\mu$ M hydroxyurea (HU), 1  $\mu$ M pomalidomide (Pom), or 0.125  $\mu$ M UNC0638). **B.** F-cell quantitation by flow cytometry of SCD patient-derived cells following shRNA scrambled control or HRI shRNA depletion combined with HbF pharmacologic induction. Statistical analyses done using two-way ANOVA analysis. \* represents significance as compared to DMSO control.  $N \geq 3$  independent biological replicates. Error bars represent standard deviation. \*  $p < 0.05$ ; \*\*  $p < 0.01$ ; \*\*\*  $p < 0.001$ .

## SUPPLEMENTAL FIGURE 6

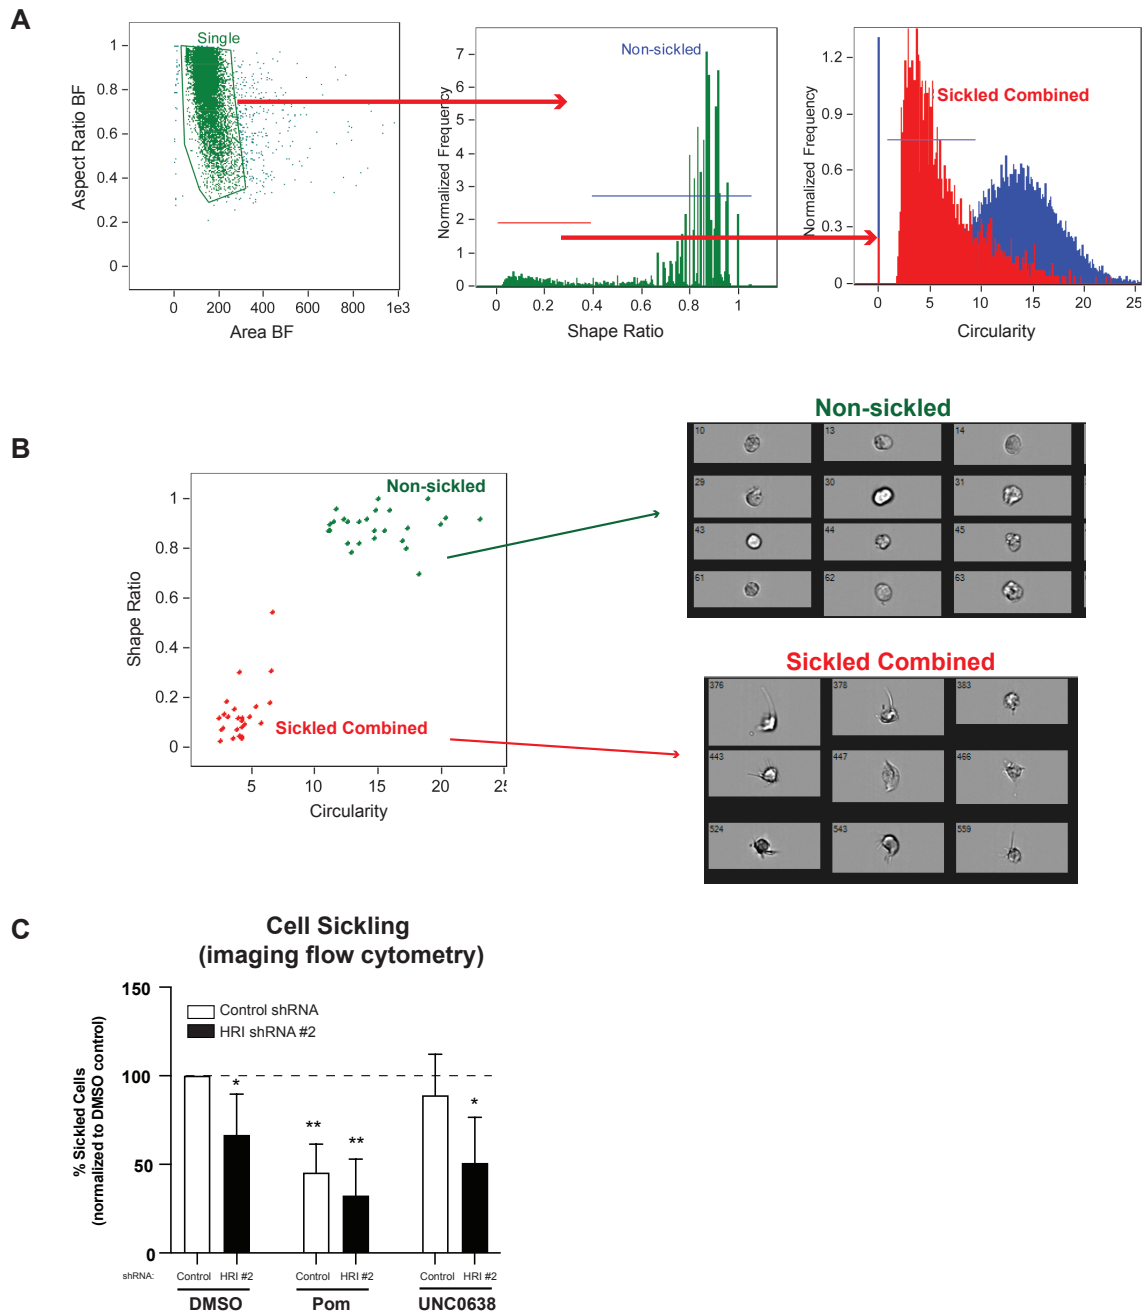

**Supplemental Figure 6. Imaging flow cytometric analysis of cellular sickling.** **A.** Gating strategy for identifying sickled vs non-sickled cells by imaging flow cytometry as modified from previously published methods.<sup>27</sup> Single focused cells were classified as sickled vs non-sickled utilizing a combination of shape ratio (ratio of short axis to long axis) and circularity. **B.** Representative flow cytometric images (60x) of sickled vs non-sickled cells. **C.** Quantitation by imaging flow cytometry of percent sickled cells (normalized to DMSO control) following low-O<sub>2</sub> exposure. Statistical analyses done using two-way ANOVA analysis. \* represents significance as compared to DMSO control. N=3 independent biological replicates. Error bars represent standard deviation. \* p<0.05; \*\* p<0.01; \*\*\* p<0.001.

## **SUPPLEMENTAL TABLES**

### **SUPPLEMENTAL TABLE 1. shRNA oligonucleotides.**

| Name            | Sequence                                                      |
|-----------------|---------------------------------------------------------------|
| Control shRNA F | CACCGGCAACAAGATGAAGAGCACCAACTCGAGTTGGTGCTCTTCATCTTGTGTTTTTG   |
| Control shRNA R | AATTCAAAAACAACAAGATGAAGAGCACCAACTCGAGTTGGTGCTCTTCATCTTGTGCCC  |
| HRI shRNA #1 F  | CACCGGCAGAGAGCAATGTGGTGTTAACTCGAGTTAACACCACATTGCTCTCTGTTTTTG  |
| HRI shRNA #1 R  | AATTCAAAAACAGAGAGCAATGTGGTGTTAACTCGAGTTAACACCACATTGCTCTCTGCC  |
| HRI shRNA #2 F  | CACCGGGCAGAAGTTCTAACAGGTTTACTCGAGTAAACCTGTTAGAACTTCTGCTTTTTTG |
| HRI shRNA #2 R  | AATTCAAAAAGCAGAAGTTCTAACAGGTTTACTCGAGTAAACCTGTTAGAACTTCTGCC   |

### **SUPPLEMENTAL TABLE 2. sgRNA sequences.**

| Name          | Sequence             |
|---------------|----------------------|
| Control sgRNA | GCACTACCAGAGCTAACTCA |
| HRI sgRNA #1  | TTGTTGGCTATCACACCGCG |
| HRI sgRNA #2  | ATAGTCGAGAGAAACAAGCG |

### **SUPPLEMENTAL TABLE 3. qRT-PCR primers.**

| Name               | Sequence               |
|--------------------|------------------------|
| $\beta$ -globin F  | TGGGCAACCCTAAGGTGAAG   |
| $\beta$ -globin R  | GTGAGCCAGGCCATCACTAAA  |
| $\gamma$ -globin F | TGGCAAGAAGGTGCTGACTTC  |
| $\gamma$ -globin R | GCAAAGGTGCCCTTGAGATC   |
| HRI F              | CTGGACCAACAGAAACGGGA   |
| HRI R              | TTCGGGTGAAGCGTACAGAC   |
| BCL11A F           | ACAAACGGAAACAATGCAATGG |
| BCL11A R           | TTTCATCTCGATTGGTGAAGGG |
| LRF/ZBTB7A F       | GCTTGGGCCGGTTGAATGTA   |
| LRF/ZBTB7A R       | GGCTGTGAAGTTACCGTCGG   |
| GATA1 F            | CTGTCCCAATAGTGCTTATGG  |
| GATA1 R            | GAATAGGCTGCTGAATTGAGGG |
| ALAS2 F            | CAGCGCAATGTCAAGCAC     |
| ALAS2 R            | TAGATGCCATGCTTGGAGAG   |
| SLC4A1 F           | ACCTCTCTCACCTCACCTTCTG |
| SLC4A1 R           | AACCTGTCTAGCAGTTGGTTGG |
| RPS18 F            | GTAACCCGTTGAACCCCAT    |
| RPS18 R            | CCATCCAATCGGTAGTAGCG   |
| AHSP F             | TGAAGGAGTTCAGCGTTCTG   |
| AHSP R             | CACCTGCTGCCTGTAATAGTTG |
| GAPDH F            | ACCACAGTCCATGCCATCACT  |
| GAPDH R            | CCATCACGCCACAGTTTCC    |

### **SUPPLEMENTAL TABLE 4. Western blot primary and secondary antibodies.**

| Name             | Primary antibody                                                            | Secondary antibody                                                           |
|------------------|-----------------------------------------------------------------------------|------------------------------------------------------------------------------|
| HRI              | EIF2AK1 (1:1000 dilution)<br>MyBioSource, Cat. #MBS-9208228                 | IRDye 800 donkey anti-rabbit IgG (1:15000 dilution)<br>Licor Cat. #926-32213 |
| BCL11A           | CTIP1/BCL11A (1:1000 dilution)<br>Abcam, Cat. #19487                        | IRDye 800 donkey anti-mouse IgG (1:15000 dilution)<br>Licor Cat. #926-32212  |
| LRF              | Pokemon/LRF (1:1000 dilution) eBioscience<br>Cat. #14-3309-82               | Armenian Hamster IgG 680 (1:15000 dilution)<br>Rockland Cat. #620-144-440    |
| $\gamma$ -globin | $\gamma$ -globin (1:1000 dilution)<br>Novus Biologicals, Cat. #NB-110-41084 | IRDye 800 donkey anti-goat IgG (1:15000 dilution)<br>Licor Cat. #925-32214   |
| $\beta$ -actin   | $\beta$ -actin (1:500 dilution)<br>Santa Cruz, Cat. #sc-47778)              | IRDye 680 donkey anti-mouse IgG (1:15000 dilution)<br>Licor Cat. #926-68072  |

**SUPPLEMENTAL TABLE 5. Comparison of DMSO control shRNA versus DMSO HRI-depleted erythroid transcripts.** RNA-seq expression of selected erythroid maturation up- and down-regulated genes comparing DMSO control shRNA samples versus DMSO HRI shRNA #2 samples. Gene numbers correspond to labels in Figure 2D. Data are shown as read counts for DMSO control and DMSO HRI-depleted samples, log<sub>2</sub> fold change, and DESeq adjusted p-values.

**DMSO Control shRNA vs DMSO HRI shRNA #2:**

| Category                | Gene Number | Gene ID        | DMSO control reads | DMSO HRI knockdown reads | Log2 fold change | Padj Value |
|-------------------------|-------------|----------------|--------------------|--------------------------|------------------|------------|
| Erythroid Upregulated   | 1           | GATA1          | 5976.9             | 6199.0                   | 0.0526           | 0.84       |
|                         | 2           | KEL            | 7191.2             | 10356.6                  | 0.5236           | 8.1E-09    |
|                         | 3           | ANK1           | 24876.2            | 26851.7                  | 0.0738           | 0.95       |
|                         | 4           | KLF1           | 35505.9            | 34891.0                  | -0.0259          | 0.92       |
|                         | 5           | FOXO3          | 36816.2            | 38826.9                  | 0.0697           | 0.66       |
|                         | 6           | AHSP           | 44995.0            | 83174.8                  | 0.8843           | 4.6E-29    |
|                         | 7           | EPB42          | 48508.9            | 81487.9                  | 0.7484           | 6.5E-24    |
|                         | 8           | GYPA           | 80201.2            | 89299.5                  | 0.1604           | 0.11       |
|                         | 9           | ALAS2          | 147138.6           | 226877.3                 | 0.6293           | 1.2E-14    |
|                         | 10          | SLC4A1 (BAND3) | 187828.5           | 252594.0                 | 0.401            | 0.46       |
|                         | 11          | SLC25A37       | 268505.8           | 282252.1                 | 0.062            | 0.76       |
| Erythroid Downregulated | 12          | GATA2          | 90.4               | 106.3                    | 0.1748           | 0.89       |
|                         | 13          | JUN            | 549.8              | 555.4                    | -0.0476          | 0.96       |
|                         | 14          | MYC            | 868.7              | 455.6                    | -0.8984          | 0.00001    |
|                         | 15          | CD44           | 1312.9             | 681.3                    | -1.1007          | 0.11       |
|                         | 16          | MYB            | 1750.7             | 1426.5                   | -0.3408          | 0.061      |
|                         | 17          | KIT            | 2634.3             | 1633.3                   | -0.6856          | 2.3E-08    |
|                         | 18          | CASP3          | 3599.8             | 6636.8                   | 0.9112           | 4.3E-12    |
|                         | 19          | PCNA           | 24437.2            | 16850.0                  | -0.5337          | 7.5E-11    |

**SUPPLEMENTAL TABLE 6. Comparison of DMSO control shRNA versus pomalidomide HRI-depleted erythroid transcripts.** RNA-seq expression of selected erythroid maturation up- and down-regulated genes comparing DMSO control shRNA samples versus 1 μM pomalidomide HRI shRNA #2 samples. Gene numbers correspond to labels in Figure 2E. Data are shown as read counts for DMSO control and pomalidomide HRI-depleted samples, log<sub>2</sub> fold change, and DESeq adjusted p-values.

**DMSO Control shRNA vs Pom HRI shRNA #2:**

| Category                | Gene Number | Gene ID        | DMSO control reads | Pom HRI knockdown reads | Log2 fold change | Padj Value |
|-------------------------|-------------|----------------|--------------------|-------------------------|------------------|------------|
| Erythroid Upregulated   | 1           | GATA1          | 5444.2             | 6598.0                  | 0.2646           | 0.12       |
|                         | 2           | KEL            | 6551.9             | 15543.9                 | 1.249            | 9.7E-38    |
|                         | 3           | ANK1           | 22655.9            | 24078.9                 | 0.0553           | 0.93       |
|                         | 4           | KLF1           | 32317.7            | 29729.6                 | -0.1152          | 0.3        |
|                         | 5           | FOXO3          | 33486.3            | 40983.9                 | 0.2823           | 0.00037    |
|                         | 6           | AHSP           | 40978.9            | 76306.1                 | 0.8952           | 1.4E-30    |
|                         | 7           | EPB42          | 44167.5            | 82705.4                 | 0.903            | 2.8E-36    |
|                         | 8           | GYPA           | 72995.1            | 64800.6                 | -0.164           | 0.21       |
|                         | 9           | ALAS2          | 133919.9           | 246836.2                | 0.883            | 1.1E-29    |
|                         | 10          | SLC4A1 (BAND3) | 171052.5           | 220158.1                | 0.3307           | 0.57       |
|                         | 11          | SLC25A37       | 244373.2           | 256606.8                | 0.0664           | 0.65       |
| Erythroid Downregulated | 12          | GATA2          | 82.4               | 218.0                   | 1.4024           | 0.000037   |
|                         | 13          | JUN            | 500.8              | 2415.9                  | 2.2701           | 6.5E-62    |
|                         | 14          | MYC            | 792.4              | 322.5                   | -1.2533          | 0.0000019  |
|                         | 15          | CD44           | 1194.9             | 741.0                   | -0.9388          | 0.34       |
|                         | 16          | MYB            | 1596.2             | 678.2                   | -1.3099          | 1.6E-10    |
|                         | 17          | KIT            | 2400.9             | 1384.1                  | -0.7887          | 3E-09      |
|                         | 18          | CASP3          | 3274.5             | 6679.2                  | 1.0553           | 9.8E-13    |
|                         | 19          | PCNA           | 22268.5            | 9738.9                  | -1.1983          | 1.2E-51    |



**SUPPLEMENTAL TABLE 7. Comparison of DMSO control shRNA versus UNC0638 HRI-depleted erythroid transcripts.** RNA-seq expression of selected erythroid maturation up- and down-regulated genes comparing DMSO control shRNA samples versus 0.125  $\mu$ M UNC0638 HRI-depleted transcripts. Gene numbers correspond to labels in Figure 2F. Data are shown as read counts for DMSO control and UNC0638 HRI-depleted samples, log<sub>2</sub> fold change, and DESeq adjusted p-values.

**DMSO Control shRNA vs UNC0638 HRI shRNA #2:**

| Category                | Gene Number | Gene ID        | DMSO control reads | UNC0638 HRI knockdown reads | Log2 fold change | Padj Value |
|-------------------------|-------------|----------------|--------------------|-----------------------------|------------------|------------|
| Erythroid Upregulated   | 1           | GATA1          | 5856.5             | 7537.5                      | 0.3588           | 0.0042     |
|                         | 2           | KEL            | 7046.5             | 10822.1                     | 0.6181           | 1.5E-11    |
|                         | 3           | ANK1           | 24374.7            | 24395.2                     | -0.0021          | 1          |
|                         | 4           | KLF1           | 34787.8            | 32246.0                     | -0.1024          | 0.53       |
|                         | 5           | FOXO3          | 36069.0            | 38316.5                     | 0.0957           | 0.4        |
|                         | 6           | AHSP           | 44087.7            | 75722.4                     | 0.7742           | 0.0006     |
|                         | 7           | EPB42          | 47529.6            | 80603.6                     | 0.7626           | 1.7E-23    |
|                         | 8           | GYPA           | 78578.8            | 71719.9                     | -0.124           | 0.24       |
|                         | 9           | ALAS2          | 144162.3           | 234142.3                    | 0.7066           | 1.5E-22    |
|                         | 10          | SLC4A1 (BAND3) | 184040.2           | 234813.9                    | 0.349            | 0.0000019  |
|                         | 11          | SLC25A37       | 263073.4           | 292281.0                    | 0.1508           | 0.082      |
| Erythroid Downregulated | 12          | GATA2          | 88.6               | 81.3                        | -0.1247          | 0.94       |
|                         | 13          | JUN            | 538.7              | 480.9                       | -0.1703          | 0.71       |
|                         | 14          | MYC            | 851.3              | 498.5                       | -0.7347          | 0.0071     |
|                         | 15          | CD44           | 1286.4             | 901.1                       | -0.7066          | 0.51       |
|                         | 16          | MYB            | 1715.6             | 1372.2                      | -0.3461          | 0.052      |
|                         | 17          | KIT            | 2581.4             | 1879.7                      | -0.4638          | 0.027      |
|                         | 18          | CASP3          | 3526.8             | 5717.7                      | 0.7248           | 0.00000017 |
|                         | 19          | PCNA           | 23945.8            | 15138.6                     | -0.6583          | 4.1E-16    |
